# Supplementary material for: Effects of microwaves on molecular arrangements in potato starch
Source: Royal Society of Chemistry journal article supplement (doi:10.1039/c6ra28048j), 2017-01-01
Supplement: c6ra28048j1.pdf [file c6ra28048j1.pdf]

# The supplementary material of figure 4.

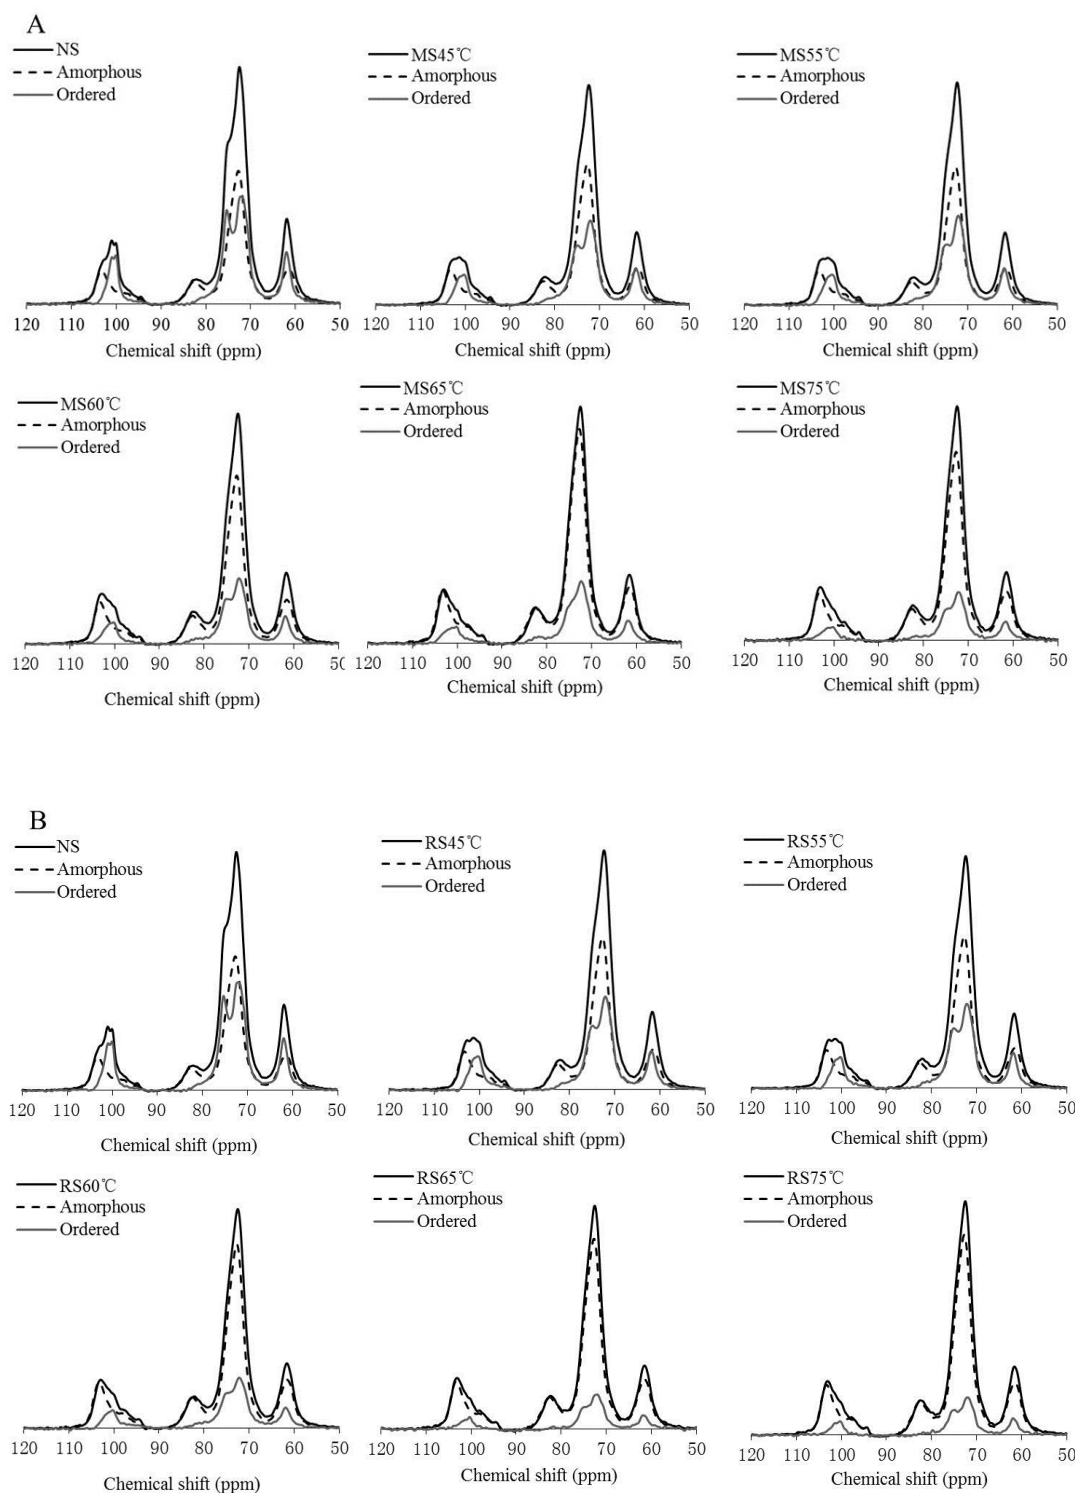

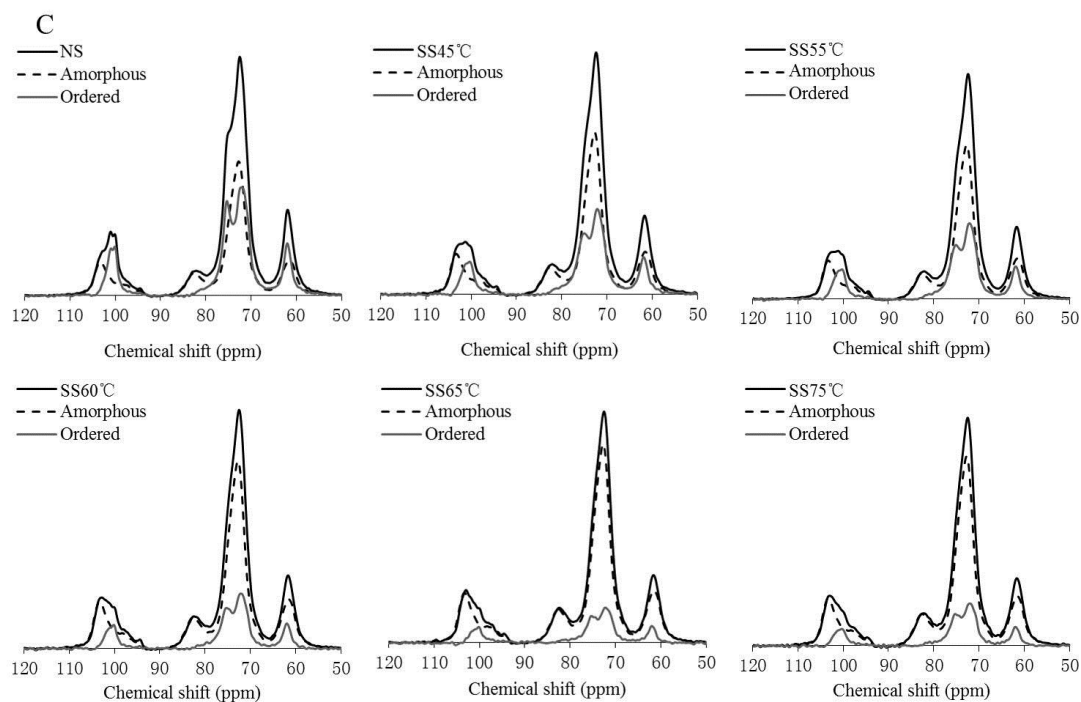

Decomposition of the  $^{13}\text{C}$  CP/MAS NMR spectra ( — ) into the amorphous ( - - ) and ordered ( — ) phases (A, MS; B, RS; C, SS). The Solver data analysis tool in Excel was used to calculate the decomposition rate of the obtained spectra. The ordered subspectrum was obtained by subtracting the subspectrum of the amorphous component from the original spectra of the sample.

The supplementary material of figure 5.

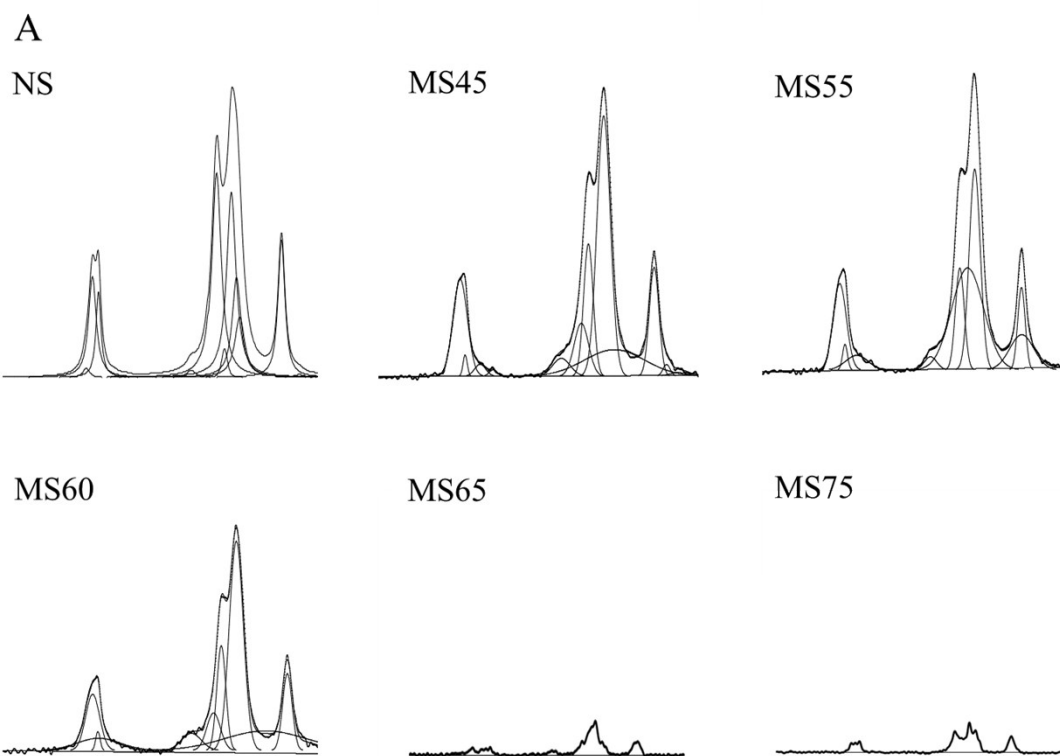

NS

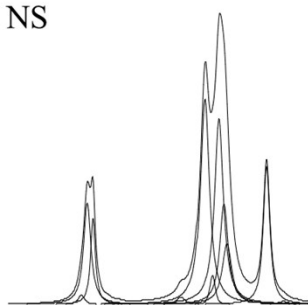

RS75

NS

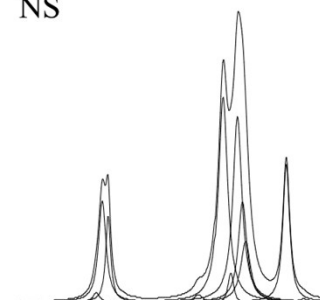

SS65

SS75

Peak fitting results of the sub-spectrum of ordered structures of three samples (A, MS; B, RS; C, SS). The number following MS indicates the final temperature of the samples. PeakFit version 4 for Win 32 (Jandel Scientific Software, CA) was used to fit the peaks of the ordered structures spectra from Figure 4. The proportions of double and single helical structures in the starch samples were calculated using the method of Tan et al. The spectra of other two samples are as supplementary materials.
